# Supplementary material
Source: PubMed Central journal article supplement (PMC3683576)

**A**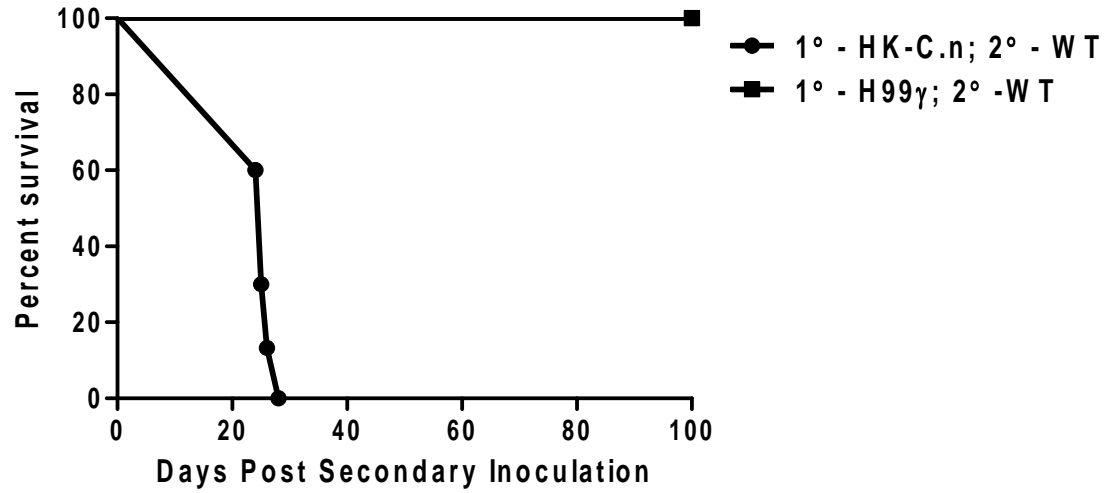**B**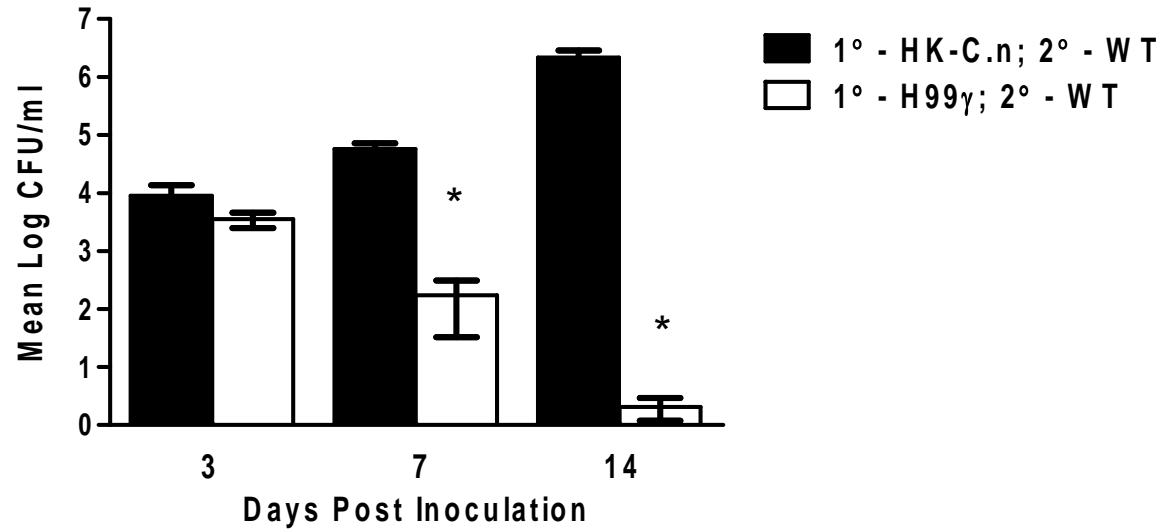

**A**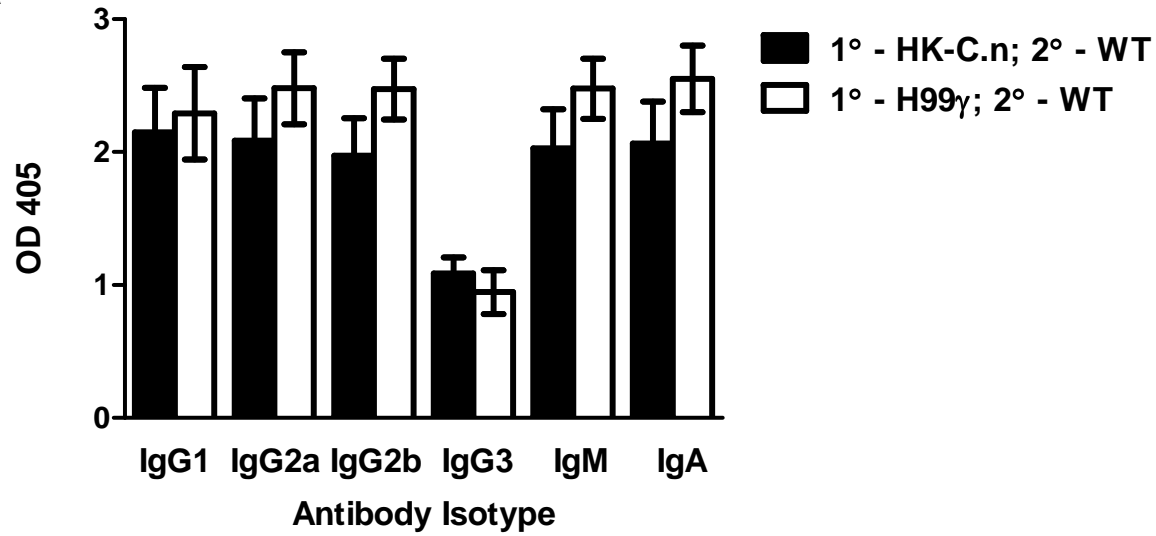**B**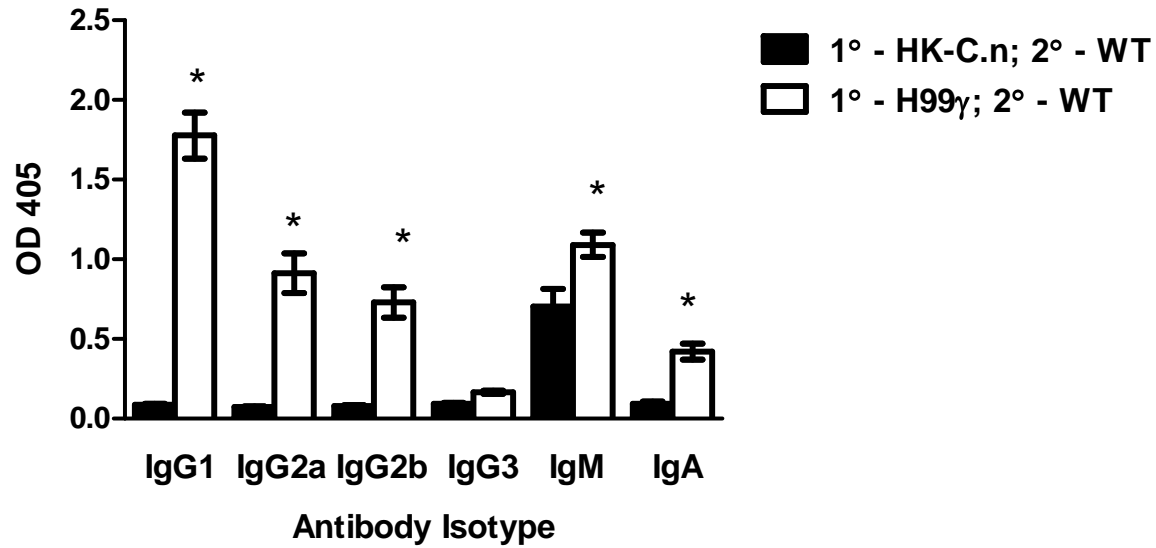

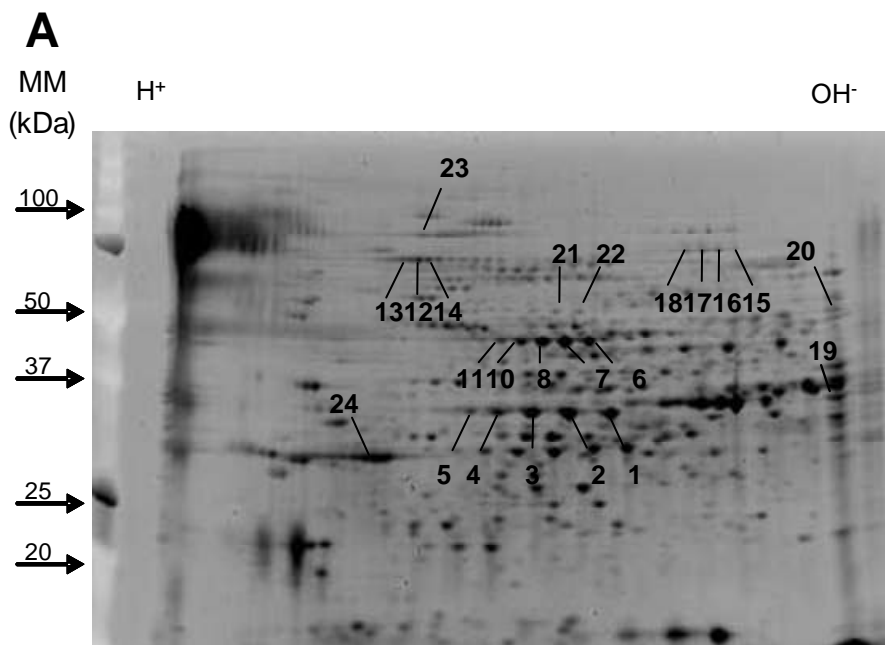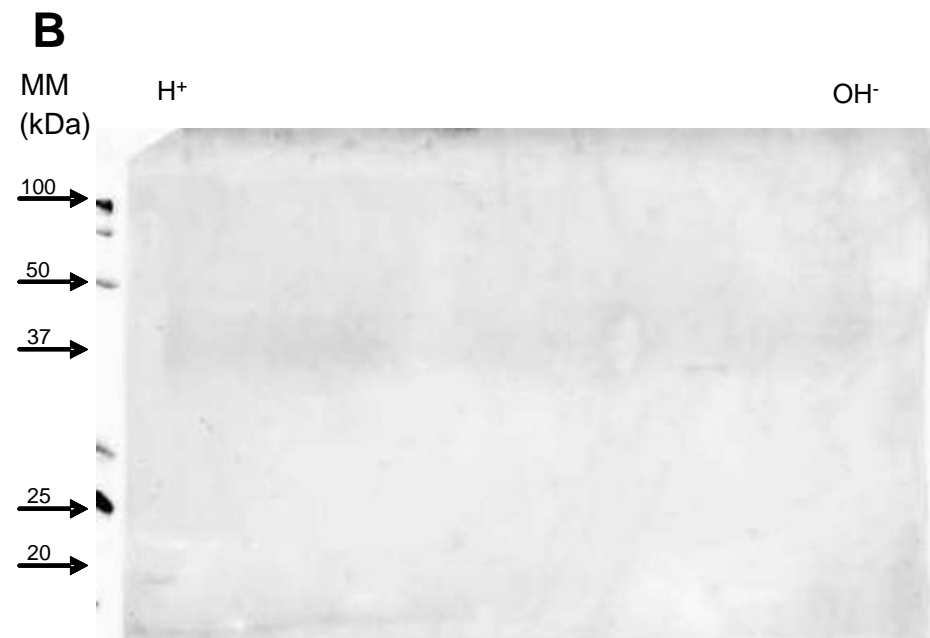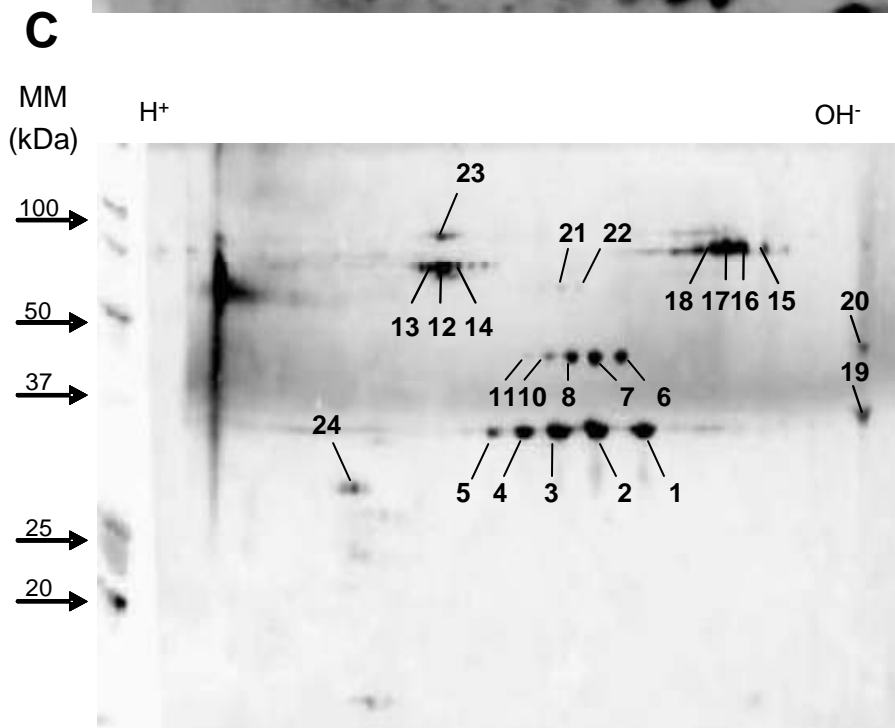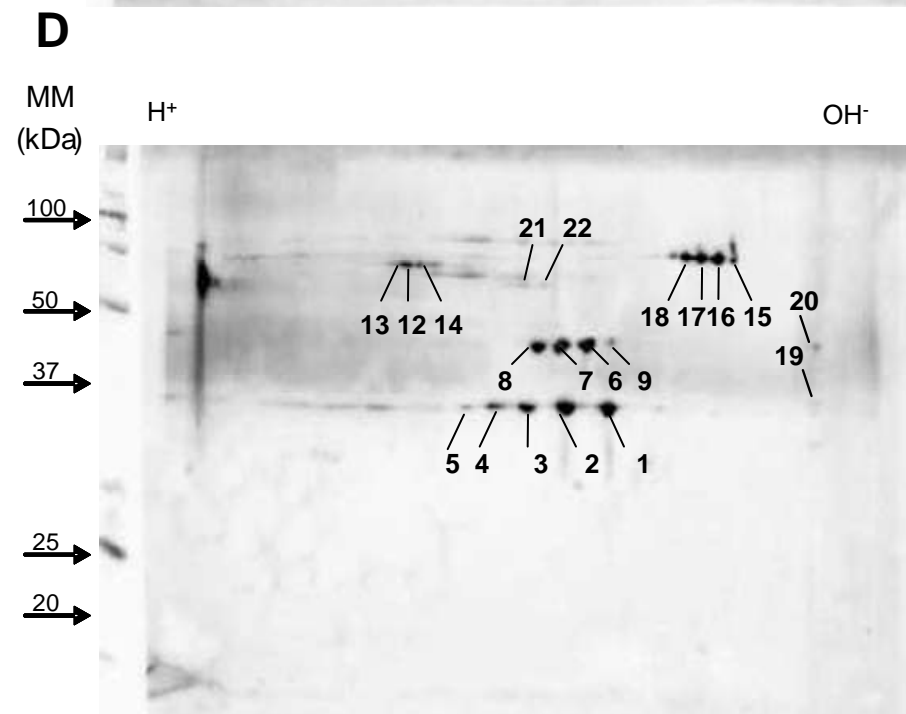

Supplement: NIHMS147121-supplement-01.pdf [file NIHMS147121-supplement-01.pdf]
